# Supplementary material for: Syntheses, crystal structures and properties of three cyano-bridged one-dimensional coordination polymers based on macrocyclic metallic tectons
Source: Royal Society of Chemistry journal article supplement (doi:10.1039/c4ra16545d), 2015-01-01
Supplement: c4ra16545d1.pdf [file c4ra16545d1.pdf]

**Supporting information of**

**Syntheses, crystal structures and properties of three cyano-bridged one-dimensional  
coordination polymers based on macrocyclic metallic tectons**

Xiang Jiang<sup>&</sup>, Bo Tao<sup>&</sup>, Xiaoli Yu, Yunhong Wang<sup>\*</sup>, Hua Xia<sup>\*</sup>

*Faculty of Material Science and Chemistry, China University of Geosciences, Wuhan, 430074,*

*China*

<sup>&</sup> *Both authors contributed equally to this work.*

**Table S1:** Selected bond lengths (Å) and angles (°) for the complexes 1-3.

| Complex 1              |           | Complex 2               |            | Complex 3                            |           |
|------------------------|-----------|-------------------------|------------|--------------------------------------|-----------|
| Ni1-N1                 | 2.15(3)   | Ni1-N2                  | 2.105(3)   | Ni2-N4                               | 2.157(4)  |
| Ni1-N3                 | 2.00(4)   | Ni1-N4                  | 2.080(3)   | Ni2-N8                               | 2.120(4)  |
| Ni1-N4                 | 2.17(3)   | Ni1-N5                  | 2.065(4)   | Ni2-N9                               | 2.047(3)  |
| Ni1-N6                 | 2.15(2)   | Ni1-N6                  | 2.120(4)   | Ni3-N2                               | 2.135(3)  |
| Ni1-N7                 | 2.16(3)   | Ni1-N7                  | 2.137(4)   | Ni3-N5                               | 2.046(4)  |
| Ni1-N9 <sup>a</sup>    | 2.109(12) | Ni1-N10 <sup>b</sup>    | 2.094(3)   | Ni3-N6                               | 2.132(4)  |
| Ni2-C13                | 1.853(9)  | Ni2-C1                  | 1.881(4)   | Ni2-C1                               | 1.854(5)  |
| Ni2-C14                | 1.848(9)  | Ni2-C2                  | 1.857(3)   | Ni2-C2                               | 1.867(5)  |
| Ni2-C15                | 1.850(7)  | Ni2-C3                  | 1.868(4)   | Ni2-C3                               | 1.878(5)  |
| Ni2-C16                | 1.874(15) | Ni2-C4                  | 1.863(3)   | Ni2-C4                               | 1.862(5)  |
| N1-Ni1-N3              | 95.3(15)  | N2-Ni1-N4               | 89.34(12)  | N4-Ni2-N8                            | 90.95(14) |
| N1-Ni1-N4              | 170.4(11) | N2-Ni1-N5               | 88.94(12)  | N4-Ni2-N9                            | 91.89(13) |
| N1-Ni1-N6              | 85.0(10)  | N2-Ni1-N6               | 90.53(12)  | N4-Ni2-N8 <sup>c</sup>               | 89.05(14) |
| N1-Ni1-N7              | 105.3(10) | N2-Ni1-N7               | 91.08(11)  | N4-Ni2-N9 <sup>c</sup>               | 88.11(13) |
| N1-Ni1-N9 <sup>a</sup> | 92.1(8)   | N2-Ni1-N10 <sup>b</sup> | 177.19(11) | N8-Ni2-N9                            | 85.61(14) |
| N3-Ni1-N4              | 91.1(15)  | N4-Ni1-N5               | 85.97(14)  | N4 <sup>c</sup> -Ni2-N8              | 89.05(14) |
| N3-Ni1-N6              | 176.7(13) | N4-Ni1-N6               | 178.58(15) | N8-Ni2-N9 <sup>c</sup>               | 94.39(14) |
| N3-Ni1-N7              | 89.9(13)  | N4-Ni1-N7               | 93.28(15)  | N4 <sup>c</sup> -Ni2-N9              | 88.11(13) |
| N3-Ni1-N9 <sup>a</sup> | 95.2(11)  | N4-Ni1-N10 <sup>b</sup> | 88.90(12)  | N8 <sup>c</sup> -Ni2-N9              | 94.39(14) |
| N4-Ni1-N6              | 89.0(9)   | N5-Ni1-N6               | 92.62(14)  | N4 <sup>c</sup> -Ni2-N8 <sup>c</sup> | 90.95(14) |
| N4-Ni1-N7              | 81.8(10)  | N5-Ni1-N7               | 179.24(14) | N4 <sup>c</sup> -Ni2-N9 <sup>c</sup> | 91.89(13) |
| N4-Ni1-N9 <sup>a</sup> | 80.2(7)   | N5-Ni1-N10 <sup>b</sup> | 88.76(12)  | N8 <sup>c</sup> -Ni2-N9 <sup>c</sup> | 85.61(14) |
| N6-Ni1-N7              | 86.9(10)  | N6-Ni1-N7               | 88.14(15)  | N2-Ni3-N5                            | 87.65(14) |
| N6-Ni1-N9 <sup>a</sup> | 88.1(7)   | N6-Ni1-N10 <sup>b</sup> | 91.18(12)  | N2-Ni3-N6                            | 89.77(13) |
| N7-Ni1-N9 <sup>a</sup> | 161.4(10) | N7-Ni1-N10 <sup>b</sup> | 91.20(11)  | N2-Ni3-N5 <sup>d</sup>               | 92.35(14) |
| C13-Ni2-C14            | 89.8(4)   | C1-Ni2-C2               | 89.98(15)  | N2-Ni3-N6 <sup>d</sup>               | 90.23(13) |
| C13-Ni2-C15            | 168.2(4)  | C1-Ni2-C3               | 177.41(16) | N5-Ni3-N6                            | 86.41(14) |
| C13-Ni2-C16            | 91.2(5)   | C1-Ni2-C4               | 91.91(15)  | N2 <sup>d</sup> -Ni3-N5              | 92.35(14) |
| C14-Ni2-C15            | 90.4(4)   | C2-Ni2-C3               | 88.38(15)  | N5-Ni3-N6 <sup>d</sup>               | 93.59(14) |
| C14-Ni2-C16            | 178.4(5)  | C2-Ni2-C4               | 177.71(16) | N2 <sup>d</sup> -Ni3-N6              | 90.23(13) |
| C15-Ni2-C16            | 88.9(5)   | C3-Ni2-C4               | 89.78(15)  | N5 <sup>d</sup> -Ni3-N6              | 93.59(14) |
|                        |           |                         |            | N2 <sup>d</sup> -Ni3-N5 <sup>d</sup> | 87.65(14) |
|                        |           |                         |            | N2 <sup>d</sup> -Ni3-N6 <sup>d</sup> | 89.77(13) |
|                        |           |                         |            | N5 <sup>d</sup> -Ni3-N6 <sup>d</sup> | 86.41(14) |
|                        |           |                         |            | C1-Ni2-C2                            | 86.9(2)   |
|                        |           |                         |            | C1-Ni2-C3                            | 174.7(2)  |
|                        |           |                         |            | C1-Ni2-C4                            | 87.6(2)   |
|                        |           |                         |            | C2-Ni2-C3                            | 93.4(2)   |
|                        |           |                         |            | C2-Ni2-C4                            | 174.3(2)  |
|                        |           |                         |            | C3-Ni2-C4                            | 92.3(2)   |

Symmetry code a: 2/3-x+y, 1/3+y, -1/6+z; b: 1/2+x, 3/2-y, 1/2+z; c: 1-x, 2-y, 1-z; d: -1-x, 1-y, -z

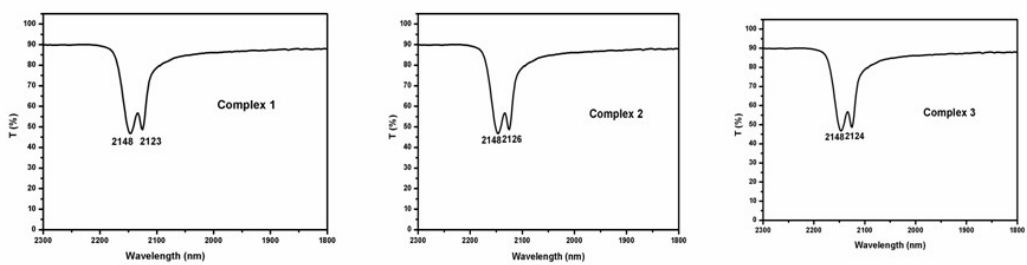

Figure S1: The split IR of -CN in complexes 1-3;

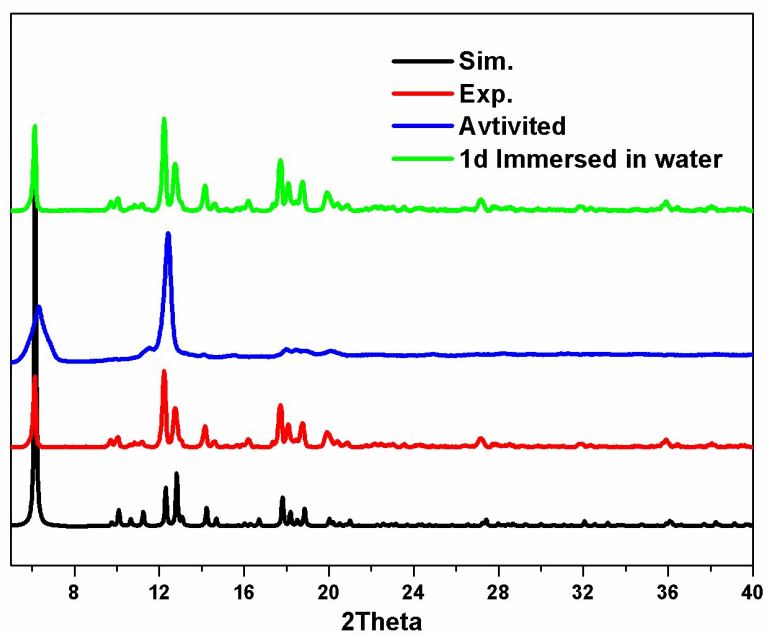

Figure S2: XRD of complex 1 (simulated, experimental, desolvated and restoration)

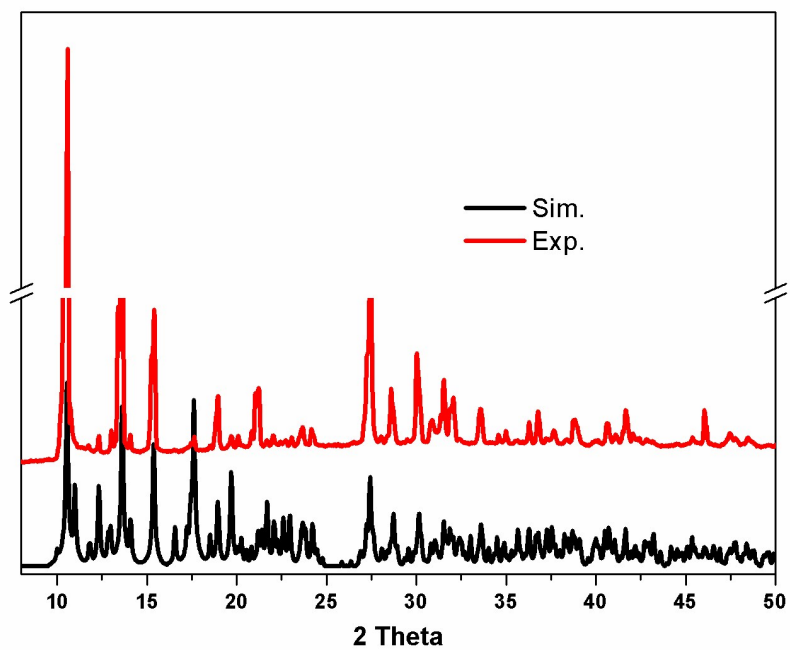

Figure S3: XRD of complex 2 (simulated, experimental)

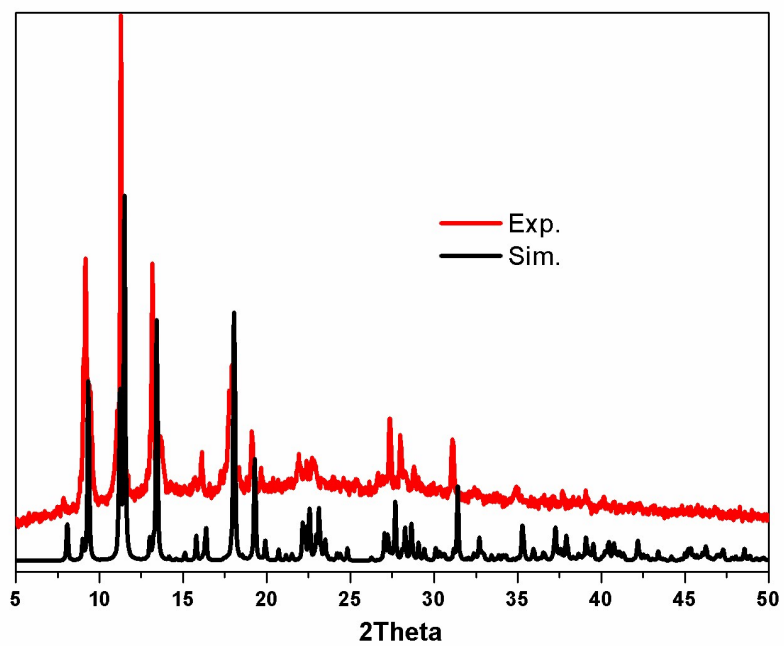

Figure S4: XRD of complex 3 (simulated, experimental)

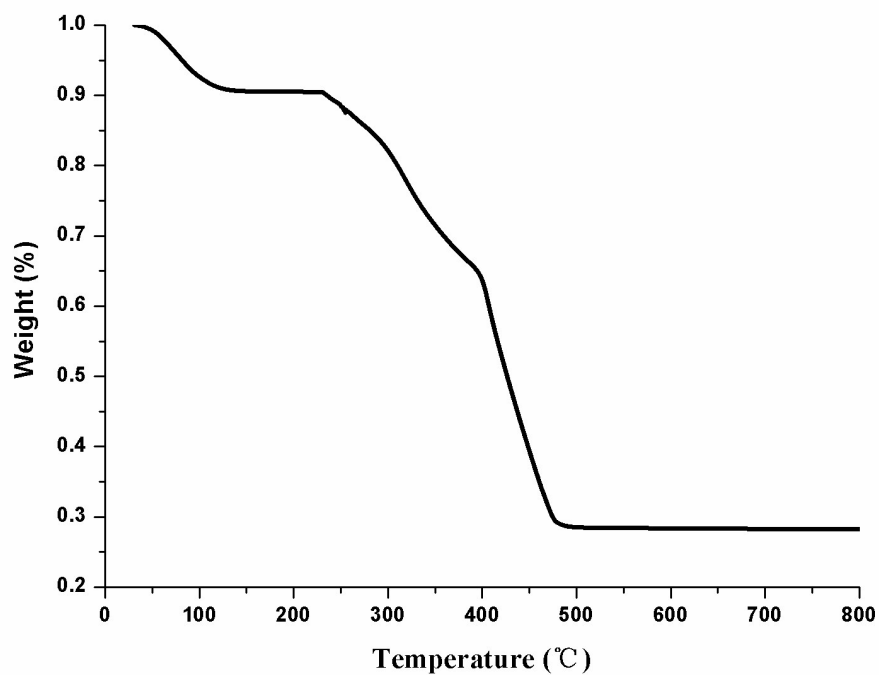

Figure S5: TGA of complex **1**;

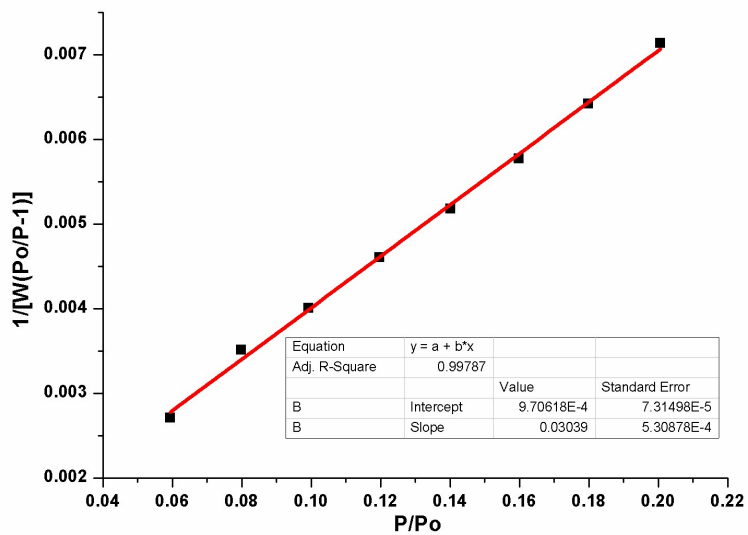

Figure S6: BET plot for **1d**.

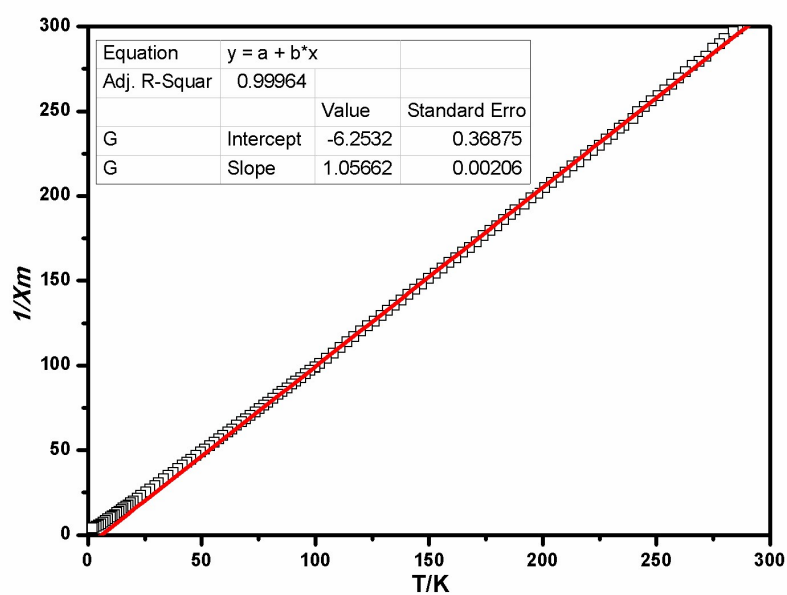

Figure S7: The fitting to the Curie-Weiss law of complex 1;

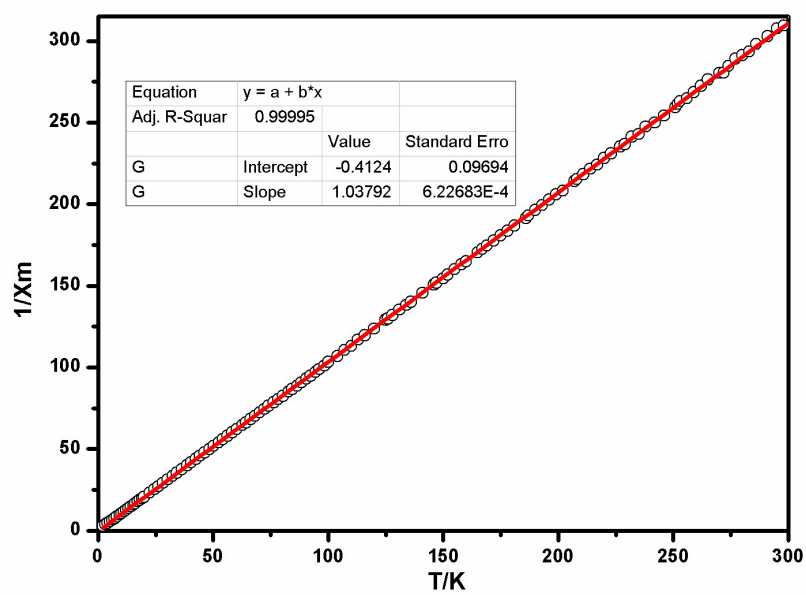

Figure S8: The fitting to the Curie-Weiss law of complex 2;

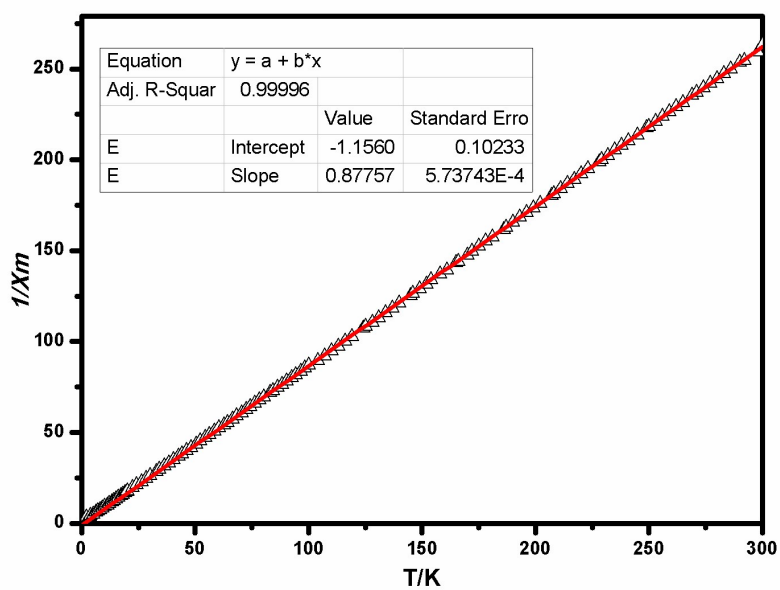

Figure S9: The fitting to the Curie-Weiss law of complex **3**;
